# Supplementary material
Source: PubMed Central journal article supplement (PMC2963391)
Supplement: supp_M110.145995_Supplementary.pdf [file supp_M110.145995_Supplementary.pdf]

## Supplementary Material

Supplementary Table T1

|                   | FORWARD                  | REVERSE                  |
|-------------------|--------------------------|--------------------------|
| <i>mTBP</i>       | ATATAATCCCAAGCGATTTGC    | GTCCGTGGCTCTCTTATTCTC    |
| <i>hTBP</i>       | GCCATAAGGCATCATTGGAC     | AACAACAGCCTGCCACCTTA     |
| <i>mGLUT1</i>     | CGAGGGACAGCCGATGTG       | TGCCGACCCTCTTCTTTCAT     |
| <i>mGLUT4</i>     | GATGAGAAACGGAAGTTGGAGAGA | GCACCACTGCGATGATCAGA     |
| <i>mHK</i>        | CCCTGCCACCAGACGAAA       | GACTTGAAACCCTTAGTCCATGA  |
| <i>mG6PDH</i>     | AGGTGACCCTAAGCCGGAC      | AGGTTTCTTTGGGTAGAAGACCA  |
| <i>mRiboRed</i>   | CTGCTCAGATCACCATGAAAGT   | TGCTTCGTGGTCAAGGTCG      |
| <i>mFAS</i>       | CGGAACTTCAGGAAATGTCC     | TCAGAGACGTGTCACTCCTGG    |
| <i>hFAS</i>       | TGTGGACATGGTCACGGAC      | GGCATCAAACCTAGACAGGTC    |
| <i>mFAT/CD36</i>  | TGGCCTTACTTGGGATTGG      | CCAGTGTATATGTAGGCTCATCCA |
| <i>mFABPpm</i>    | AGCGGCTGACCAAGGAGTT      | GACCCCTGCCACGGAGAT       |
| <i>mFATP1</i>     | GGCTCCTGGAGCAGGAACA      | ACGGAAGTCCCAGAAACCAA     |
| <i>mFATP3</i>     | CAGCTCTACAGCCATGTTTCTGA  | CAAAGATTCTGGAGCCTGAGA    |
| <i>mFATP4</i>     | GGCTTCCCTGGTGTACTATGGAT  | ACGATGTTTCTGCTGAGTGGTA   |
| <i>mFATP6</i>     | GGCTTGAGGATGCCGCTTA      | GTAATCTGGGCTCATGCTATGAAG |
| <i>mLPL</i>       | GGGAGTTTGGCTCCAGAGTTT    | TGTGTCTTCAGGGGTCCTTAG    |
| <i>mDGAT</i>      | TCCGTCCAGGGTGGTAGTG      | TGAACAAGAATCTGCAGACGA    |
| <i>mtGPAT</i>     | ACAGTTGGCACAATAGACGTTT   | CCTTCCATTTCACTGTTGCAGA   |
| <i>mACS</i>       | CTCACATTATATTGCTGCCTGT   | TCTCTTTGCCATAGCGTTTTTCT  |
| <i>hACS</i>       | AAAAGCTAAGCCCACTTCAGAC   | ACTTGGATACAGCATGGTCAAAT  |
| <i>mLXR alpha</i> | GGGAGGAGTGTGTGCTGTGCTCAG | GAGCGCCTGTTACACTGTTGC    |
| <i>hLXR alpha</i> | CATGGCACCAGATCCCCATAG    | GGGTAGCTGTTAGCAAAGTCAA   |
| <i>mLXR beta</i>  | GGCCTGGACGATGCAGAGT      | CGATCGGCTGAGAAGATGTTG    |
| <i>mRXR alpha</i> | AACCCAGCTCACCAAATGACC    | AACAGGACAATGGCTCGCAGG    |
| <i>hRXR alpha</i> | TTCGCTAAGCTCTTGCTC       | ATAAGGAAGGTGTCAATGGG     |
| <i>mRXR beta</i>  | GCCAAGCTGCTGTTACGTCTT    | ACAGGTGCTCCAGACACTTGA    |
| <i>hRXR beta</i>  | GAAGCTCAGGAAACACTAC      | TGCAGTCTTTGTTGTCCTC      |
| <i>mRXR gamma</i> | CCGCTGCCAGTACTGTCG       | ACCTGGTCTCCAAGGTGAG      |
| <i>mSREBP1c</i>   | GCATGCCATGGGCAAGTAC      | CCACATAGATCTCTGCCAGTGTG  |
| <i>mLipin</i>     | CTCCGCTCCCGAGAGAAAAG     | TCATGTGCAAATCCACGGACT    |
| <i>hGLUT4</i>     | CTCAGCAGCGAGTACTGG       | CCCCAATGTTGACCCAAACTG    |
| <i>hHK</i>        | GAGCCACCCTACCCCTACT      | ACCCAAAGCACACGGAAAGTT    |
| <i>hG6PDH</i>     | CAAACAGAGTGAGCCCTTCTTC   | CTCATGCAGGACTCGTGAATG    |

### Supplementary Table T1

Sequences of primers used for RT-PCR.

m, mouse-specific primers; h, human-specific primers.

Supplementary Figure S1

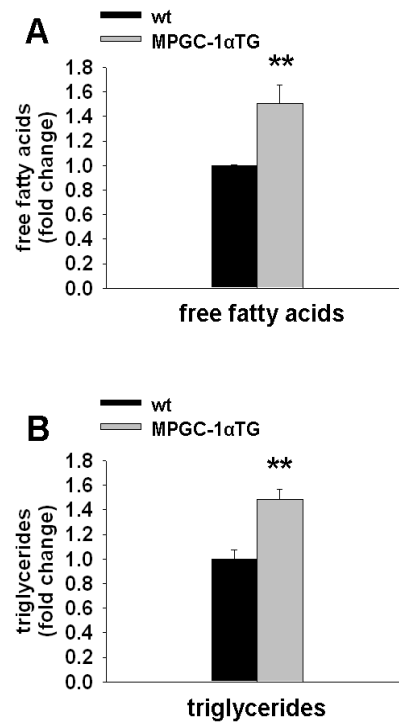

**Supplementary Figure S1. Incorporation of *de-novo* synthesized lipids into different lipid components.**

(A and B) Tritium labeled free fatty acids (A) and triglycerides (B) in glycolytic muscle of MPGC-1α TG mice vs. controls. All values are means  $\pm$ SE. (n=5 per group). \*\* p<0.01.

Supplementary Figure S2

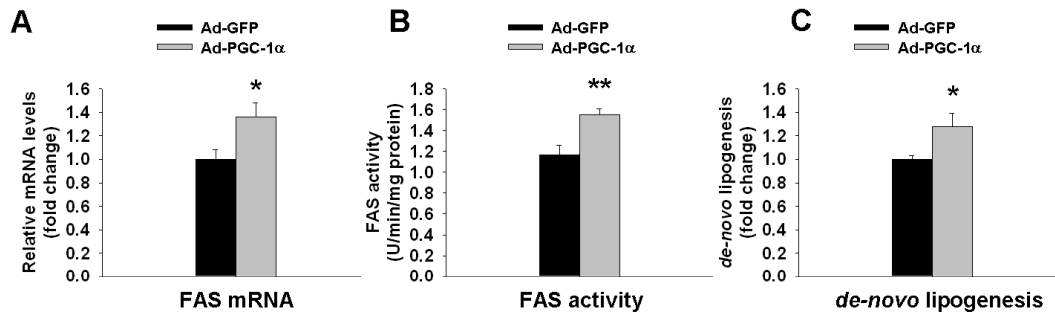

**Supplementary Figure S2. Enhanced lipid anabolism in isolated muscle cells overexpressing PGC-1 $\alpha$ .**

(A-C) FAS gene expression (A), activity (B) and *de-novo* lipogenesis (C) in isolated muscle cells overexpressing either GFP (control), or PGC-1 $\alpha$ . All values are means  $\pm$ SE. (n=8 per group). \* p<0.05; \*\* p<0.01.

Supplementary Figure S3

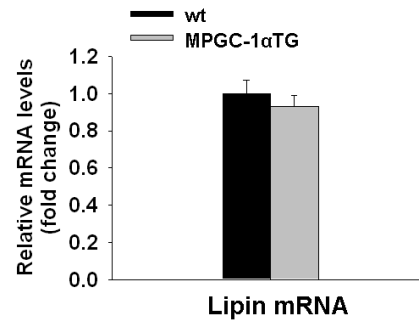

**Supplementary Figure S3. Lipin gene expression**

Relative gene expression of lipin in EDL as measured by RT-PCR and expressed as fold change over controls.

Supplementary Figure S4

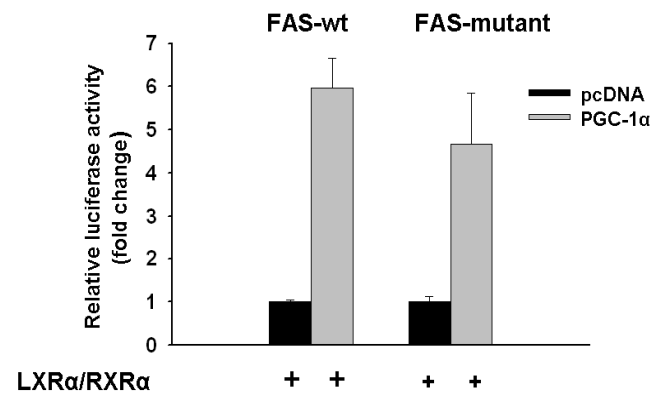

**Supplementary Figure S4. Luciferase assay**

Promoter activity of the FAS wild-type promoter (FAS-wt) and of a SREBP<sub>1</sub>-binding mutant (FAS-mutant) following transfection of myoblasts with pcDNA (empty vector) (black bars) or PGC-1α (grey bars). LXRα/RXRα expression plasmids were cotransfected for all assays.

Values are expressed as means ±SE (n =6 per group)

Supplementary Figure S5

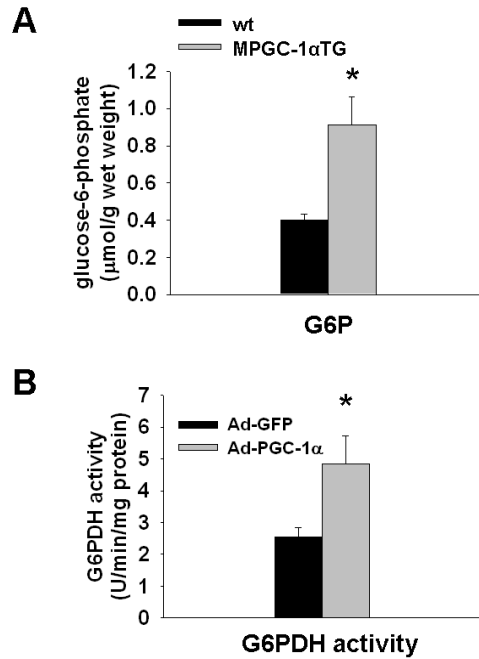

**Supplementary Figure S5. Increased Glucose-6-phosphate levels in muscle and elevated G6PDH activity in isolated muscle cells overexpressing PGC-1 $\alpha$ .**

(A) Glucose-6-phosphate (G6P) levels in glycolytic muscles of MPGC-1 $\alpha$  TG mice vs. controls. All values are means  $\pm$ SE. (n=5-6 per group). \* p<0.05.

(B) G6PDH activity in isolated muscle cells overexpressing either GFP (control), or PGC-1 $\alpha$ . All values are means  $\pm$ SE. (n=6 per group). \* p<0.05.

Supplementary Figure S6

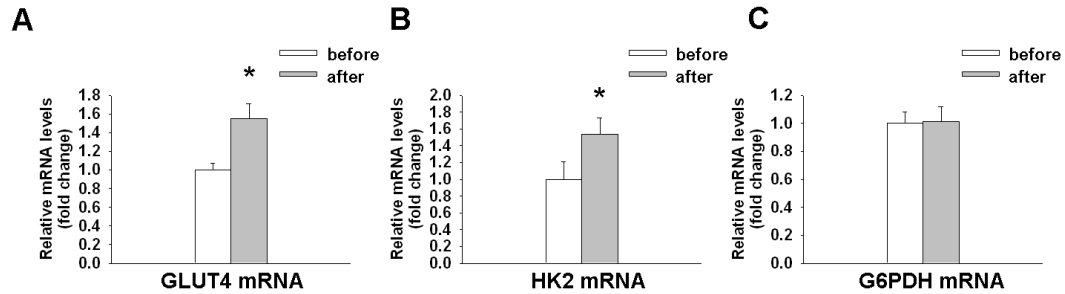

**Supplementary Figure S6. GLUT4, HK2 and G6PDH mRNA levels in endurance athletes pre- and post-exercise.**

(A-C) Relative expression of GLUT4 (A), HK2 (B) and G6PDH (C) in human muscle biopsies pre- and post-exercise. Mean values are expressed as bars with SE (n=6). \* p<0.05 as assessed by paired *t*-test.
